# Supplementary figures and images for: Physical activity and screen time in Australian Outside School Hours Care: current versus best practice
Source: Research Square preprint supplement (doi:10.21203/rs.3.rs-955933/v1), 2021-10-21

**Supplementary File 4: Feedback on draft guidelines**

**
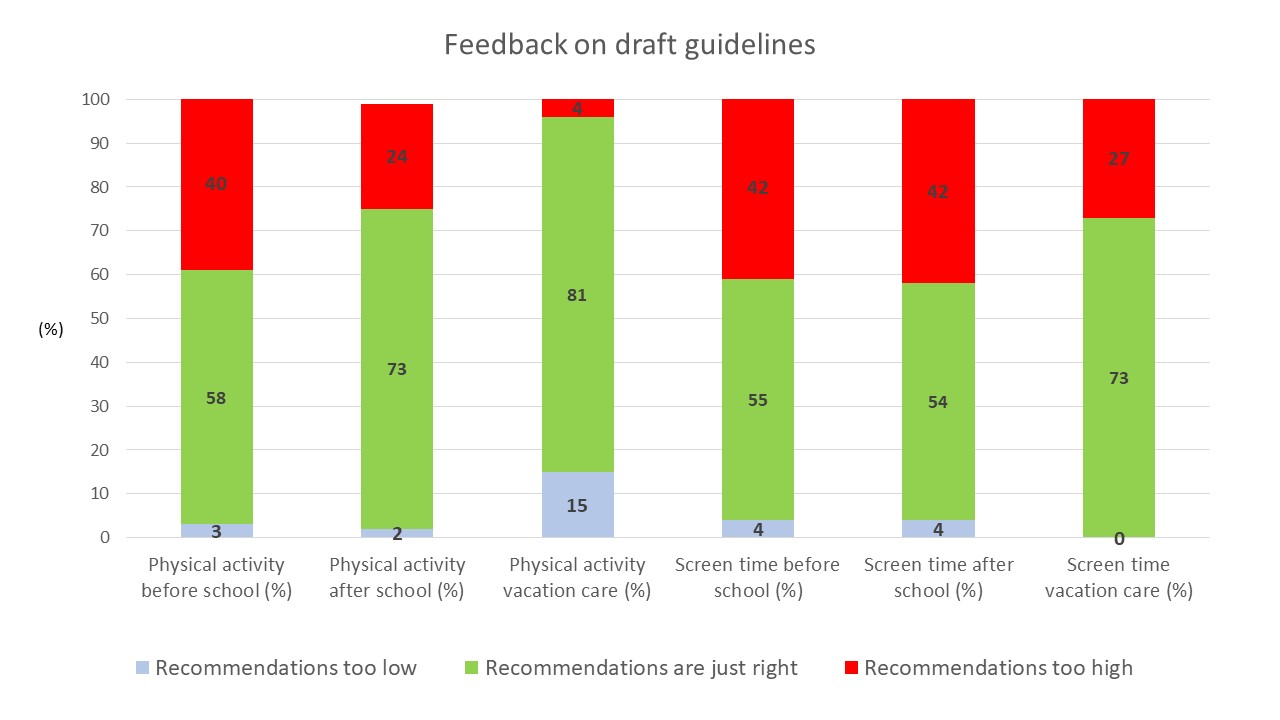
**

Supplement: Supplementary file 1 [file 1e5bae40934a8425912170cf.docx]

**Supplementary File 1: Australian physical activity and screen time guidelines for OSHC (15)**


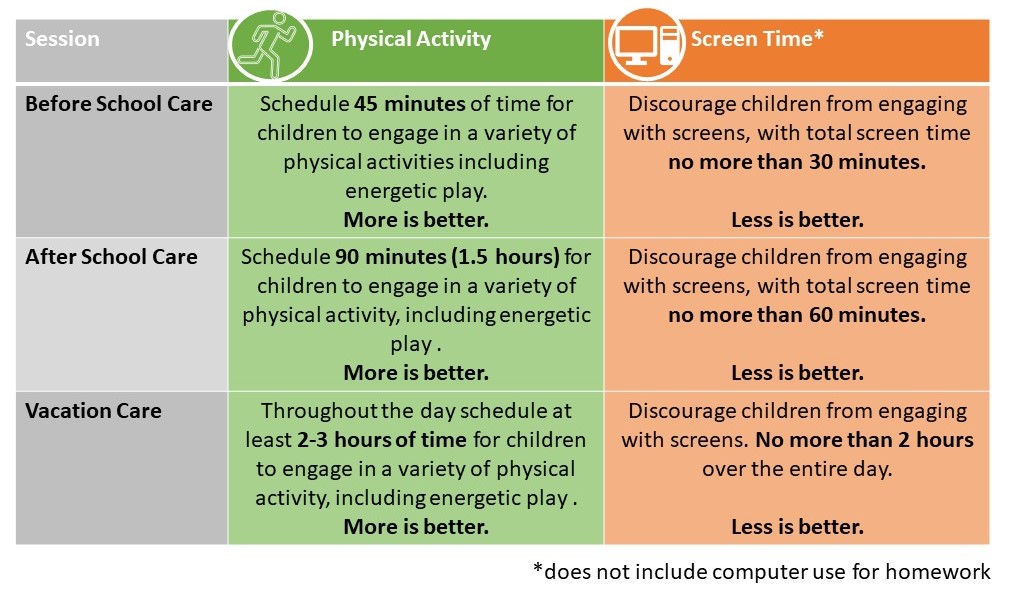

Supplement: Supplementary file 4 [file d2383b8b598e633d244ca92b.docx]
